# Supplementary material
Source: PubMed Central journal article supplement (PMC5647192)
Supplement: BPH-174-3713-s001.pdf [file BPH-174-3713-s001.pdf]

Altieri P *et al.*, 5-fluorouracil causes endothelial cell senescence: potential protective role of glucagon-like peptide 1.

### **Supporting Information**

*Table S1. Primers used in the study*

| <b>Gene</b>  | <b>Accession number</b> | <b>Primer sequence (5'-3')</b>                           | <b>Product length</b> |
|--------------|-------------------------|----------------------------------------------------------|-----------------------|
| <i>VCAM1</i> | NM_001078.3             | Fwd: TCAGATTGGAGACTCAGTCATGT<br>Rev: ACTCCTCACCTTCCCGCTC | 109                   |
| <i>ICAM1</i> | NM_000201.2             | Fwd: GGCCGGCCAGCTTATACAC<br>Rev: AGACACTTGAGCTCGGGCA     | 166                   |
| <i>TYMP</i>  | NM_001257989.1          | Fwd: CCTGCGGACGGAATCCTATA<br>Rev: TGTGATGAGTGGCAGGCTGT   | 69                    |
| <i>GAPDH</i> | NM_001289746.1          | Fwd: TGGTCACCAGGGCTGCTTT<br>Rev: AGCTTCCCGTTCTCAGCCT     | 151                   |

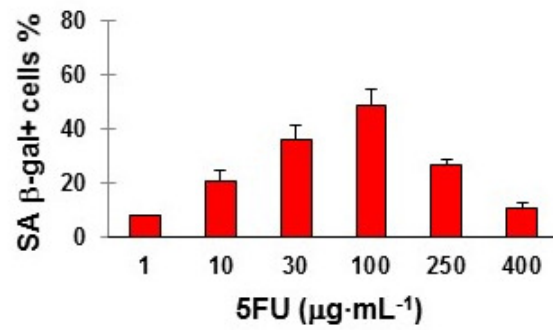

***Fig. S1. Senescence of EA.hy926 cells in response to increasing concentrations of 5FU.***

EA.hy926 cells were incubated for 4 hours with the indicated concentrations of 5FU. After this treatment, senescence was assessed as percentage of SA  $\beta$ -gal positive cells. No apoptosis, as evaluated by immunocytochemistry using a rabbit monoclonal anti-cleaved caspase-3 antibody (clone 5A1E, Cell Signaling Technologies), was observed. The experiment was repeated 5 times.

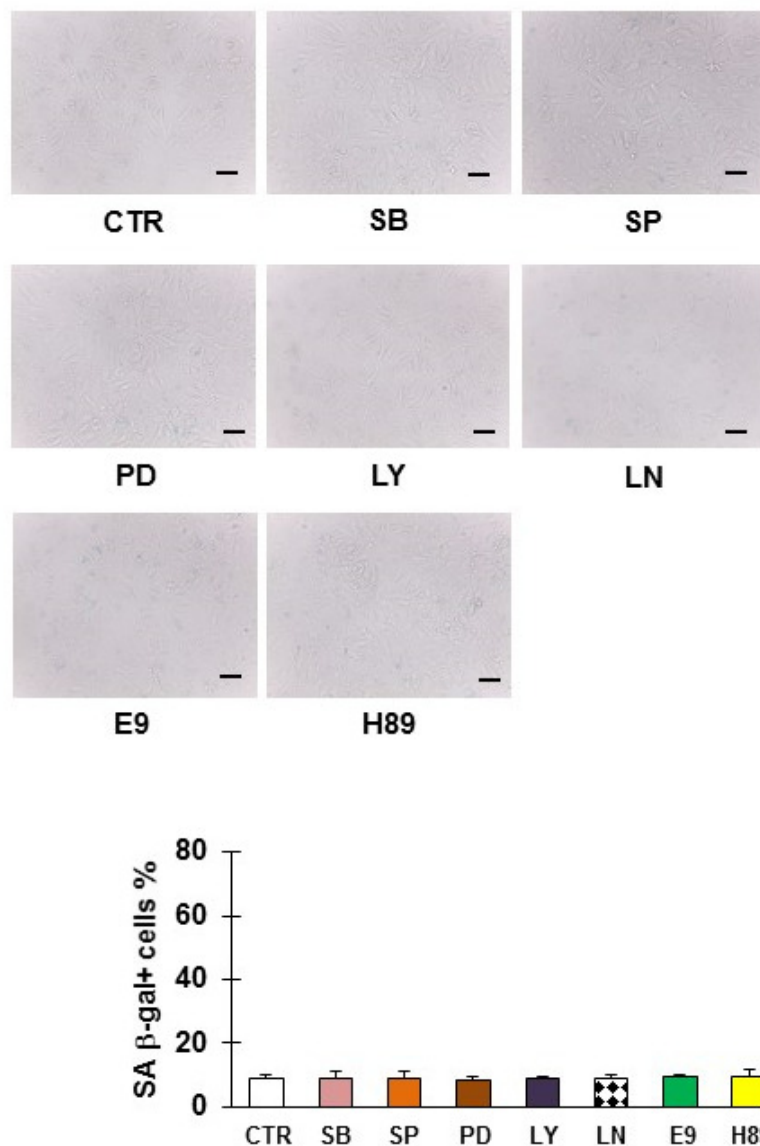

**Fig. S2. Effect of the signaling inhibitors used for functional experiments on senescence of EA.hy926 cells.**

EA.hy926 cells were treated with the following molecules (see Methods for times and concentrations): SB203580 (inhibitor of p38); SP600125 (inhibitor of JNK); PD98059 (inhibitor of ERK1/2); LY-294002 (inhibitor of phosphatidylinositol-3 kinase); L-NAME (inhibitor of nitric oxide synthase); exendin (9-39) (antagonist of GLP-1 receptor); or H89 (inhibitor of PKA). Senescence was evaluated by staining for SA  $\beta$ -gal and compared to the one found in untreated cells (CTR). The upper part of the Figure shows representative pictures of SA  $\beta$ -gal staining, whilst the percentage of positive cells (mean  $\pm$  SEM of 5 independent replicates) is presented in the graph in the lower part.

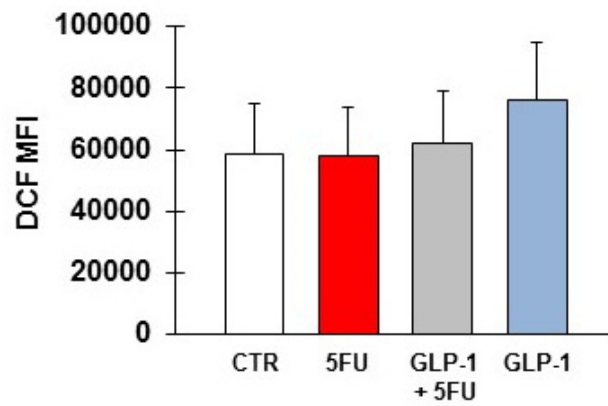

***Fig. S3. Oxidative stress in EA.hy926 cells treated with 5FU and/or GLP-1.***

Mean fluorescence intensity (MFI) of dichlorofluorescein in EA.hy926 cells after no treatment (CTR) or incubation with 5FU, 5FU preceded by GLP-1, or GLP-1 alone. N = 5.

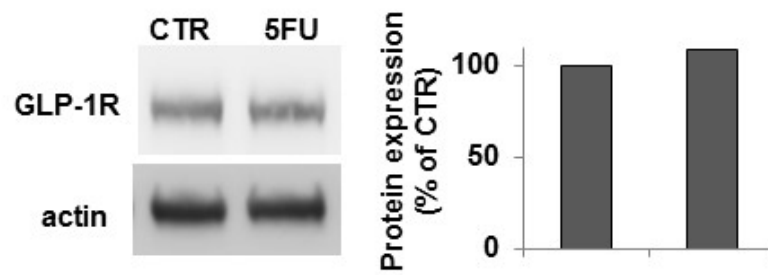

***Fig. S4. GLP-1R protein levels in EA.hy926 cells.***

Representative western blot and densitometry analysis of the expression of GLP-1R protein in EA.hy926 cells after no treatment (CTR) or exposure to 5FU.

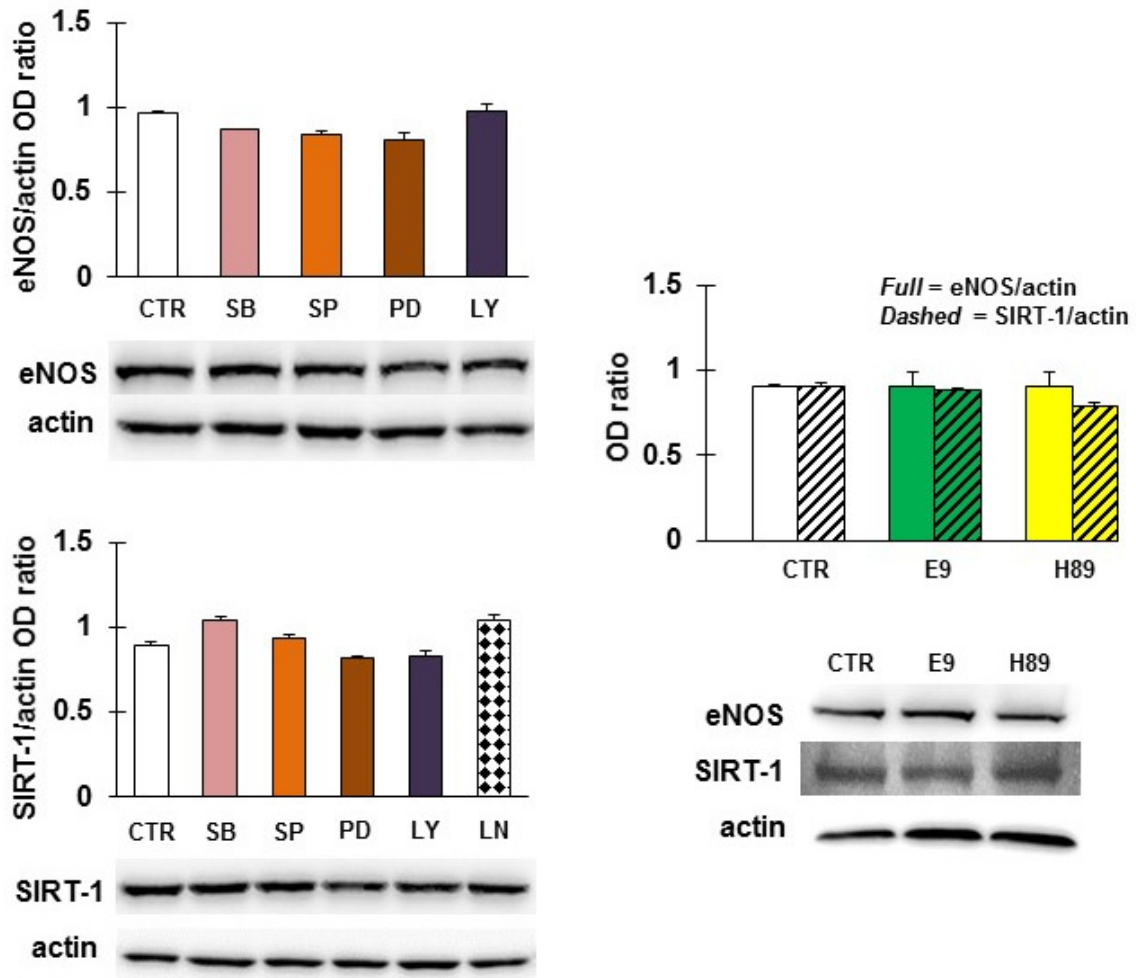

**Fig. S5. Effect of the signaling inhibitors used for functional experiments on eNOS and SIRT-1 expression by EA.hy926 cells.**

Densitometry analysis and representative western blots for eNOS and SIRT-1 in EA.hy926 after no treatment (CTR) or incubation with the following molecules (see Methods for times and concentrations): SB203580 (inhibitor of p38); SP600125 (inhibitor of JNK); PD98059 (inhibitor of ERK1/2); LY-294002 (inhibitor of phosphatidylinositol-3 kinase); L-NAME (inhibitor of nitric oxide synthase); exendin (9-39) (antagonist of GLP-1 receptor); or H89 (inhibitor of PKA). The optical density of the eNOS and SIRT-1 bands was normalised for the one of actin. Data are mean  $\pm$  SEM of 5 independent experiments.
